# Supplementary material
Source: Springer Nature journal article supplement (https://www.springermedizin.de/resource/supplementary/12984_2008_199_MOESM4_ESM.pdf/9605512)

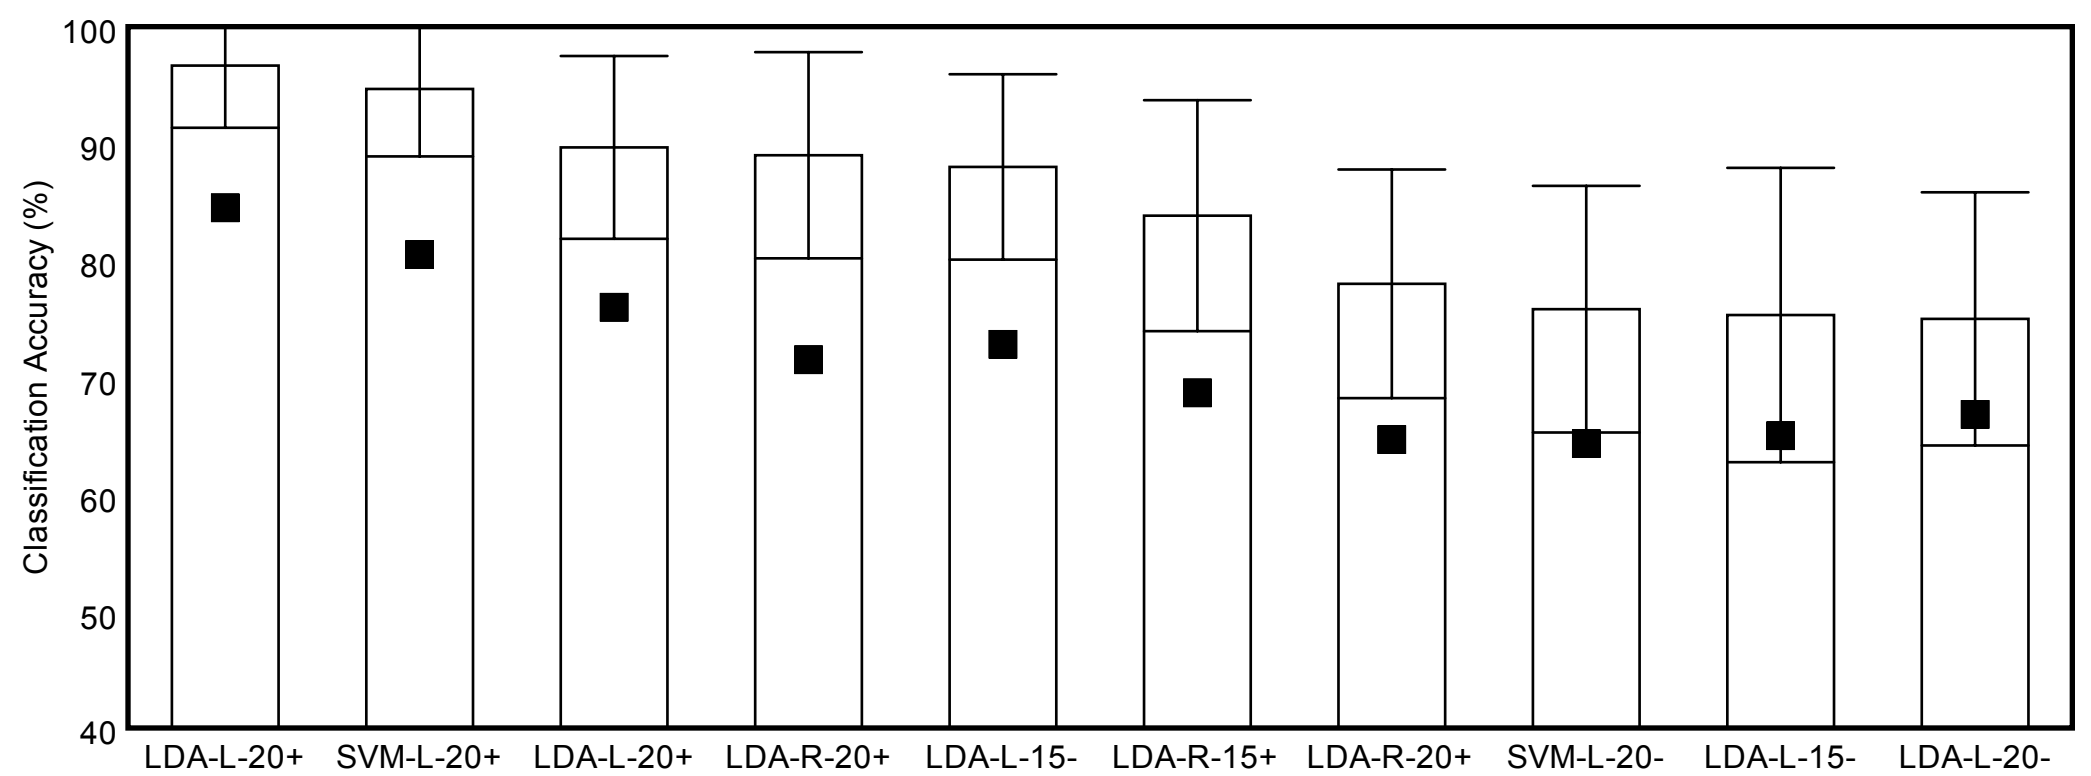

Supplement: MOESM4 [file 9605512]
